# Supplementary material for: A Cohort Study: Comorbidity and Stage Affected the Prognosis of Melanoma Patients in Taiwan
Source: PubMed Central journal article supplement (PMC8927660; doi:10.3389/fonc.2022.846760), 2022-03-03
Supplement: DataSheet_1.pdf [file DataSheet_1.pdf]

Supplementary table 1

| Comorbidity                           | Weight | ICD-9-CM                                                  | ICD-10-CM                                                                                                                                                                |
|---------------------------------------|--------|-----------------------------------------------------------|--------------------------------------------------------------------------------------------------------------------------------------------------------------------------|
| Myocardial infarction                 | 1      | 410.x<br>412.x                                            | I21, I22, I252                                                                                                                                                           |
| Congestive heart failure              | 1      | 428.x                                                     | I50                                                                                                                                                                      |
| Peripheral vascular disease           | 1      | 441.x<br>443.9<br>785.4<br>V43.4                          | I71, I790, I739, R02,<br>Z958, Z959                                                                                                                                      |
| Cerebrovascular disease               | 1      | 430.x-438.x                                               | I60, I61, I62, I63, I65,<br>I66, G450, G451, G452,<br>G458, G459, G46,<br>I64, G454, I670, I671,<br>I672, I674, I675, I676,<br>I677 I678, I679, I681, I682,<br>I688, I69 |
| Dementia                              | 1      | 290.x                                                     | F00, F01, F02, F051                                                                                                                                                      |
| Chronic pulmonary disease             | 1      | 490.x-496.x<br>500.x-505.x                                | J40, J41, J42, J43, J44,<br>J45, J46, J47, J67, J44,<br>J60, J61, J62, J63, J66,<br>J64, J65                                                                             |
| Connective tissue disease             | 1      | 710.0<br>710.1<br>710.4<br>714.0-714.2<br>714.81<br>725.x | M32, M34, M332, M053,<br>M058, M059, M060,<br>M063, M069, M050,<br>M052, M051, M353                                                                                      |
| Peptic ulcer disease                  | 1      | 531.x-534.x                                               | K25, K26, K27, K28                                                                                                                                                       |
| Mild liver disease                    | 1      | 571.2<br>571.4-571.6                                      | K702, K703, K73, K717,<br>K740, K742, K746, K743,<br>K744, K745                                                                                                          |
| Diabetes without chronic complication | 1      | 250.0-250.3<br>250.7                                      | E109, E119, E139, E149,<br>E101, E111, E131, E141,<br>E105, E115,<br>E135, E145                                                                                          |
| Diabetes with chronic complication    | 2      | 250.4-250.6                                               | E102, E112, E132, E142<br>E103, E113, E133, E143<br>E104, E114, E134, E144                                                                                               |
| Hemiplegia or paraplegia              | 2      | 342.x<br>344.1                                            | G81 G041, G820, G821,<br>G822                                                                                                                                            |
| Renal disease                         | 2      | 582.x<br>583-583.7<br>585.x<br>586.x<br>588.x             | N03, N052, N053, N054,<br>N055, N056, N072, N073,<br>N074, N01, N18, N19,<br>N25                                                                                         |

|                                                                                    |   |                                           |                                                                                                                                                                                                                             |
|------------------------------------------------------------------------------------|---|-------------------------------------------|-----------------------------------------------------------------------------------------------------------------------------------------------------------------------------------------------------------------------------|
| Any malignancy, including lymphoma and leukemia, except malignant neoplasm of skin | 3 | 140.x-172.x<br>174.x-195.8<br>200.x-208.x | C0, C1, C2, C3, C40, C41, C43, C45, C46, C47, C48, C49, C5, C6, C70, C71, C72, C73, C74, C75, C76, C80, C81, C82, C83, C84, C85, C883, C887, C889, C900, C901, C91, C92, C93, C940, C941, C942, C943, C9451, C947, C95, C96 |
| Severe liver disease                                                               | 3 | 572.2-572.8                               | K729, K766, K767, K721                                                                                                                                                                                                      |
| Metastatic solid tumor                                                             | 6 | 196.x-199.1                               | C77, C78, C79, C80                                                                                                                                                                                                          |
| AIDS/HIV                                                                           | 6 | 042.x-044.x                               | B20, B21, B22, B23, B24                                                                                                                                                                                                     |
